# Supplementary material for: Global Trends in Research of Macrophages Associated With Acute Lung Injury Over Past 10 Years: A Bibliometric Analysis
Source: PubMed Central journal article supplement (PMC8173163; doi:10.3389/fimmu.2021.669539), 2021-05-20
Supplement: DataSheet_1.pdf [file DataSheet_1.pdf]

**S table 1. The 31 references of cluster 2 in Figure 4A**

|    | Athour          | DOI                                   | Citations | Title                                                                                                                        |
|----|-----------------|---------------------------------------|-----------|------------------------------------------------------------------------------------------------------------------------------|
| 1  | aggarwal nr     | 10.1152/ajplung.00341.2013            | 106       | Diverse macrophage populations mediate acute lung inflammation and resolution                                                |
| 2  | herold s        | 10.3389/fimmu.2011.00065              | 70        | Acute lung injury: how macrophages orchestrate resolution of inflammation and tissue repair                                  |
| 3  | johnston lk     | 10.1165/rcmb.2012-0090oc              | 65        | Pulmonary macrophage subpopulations in the induction and resolution of acute lung injury                                     |
| 4  | mosser dm       | 10.1038/nri2448                       | 62        | Exploring the full spectrum of macrophage activation                                                                         |
| 5  | hussell t       | 10.1038/nri3600                       | 52        | Alveolar macrophages: plasticity in a tissue-specific context                                                                |
| 6  | sica a          | 10.1172/jci59643                      | 48        | Macrophage plasticity and polarization: in vivo veritas                                                                      |
| 7  | d'alessio fr    | 10.1172/jci36498                      | 46        | CD4+CD25+Foxp3+ Tregs resolve experimental lung injury in mice and are present in humans with acute lung injury              |
| 8  | gordon s        | 10.1016/j.immuni.2010.05.007          | 45        | Alternative activation of macrophages: mechanism and functions                                                               |
| 9  | janssen wj      | 10.1164/rccm.201011-1891oc            | 44        | Fas determines differential fates of resident and recruited macrophages during resolution of acute lung injury               |
| 10 | gordon s        | 10.1038/nri978                        | 42        | Alternative activation of macrophages                                                                                        |
| 11 | misharin av     | 10.1165/rcmb.2013-0086ma              | 41        | Flow cytometric analysis of macrophages and dendritic cell subsets in the mouse lung                                         |
| 12 | murray pj       | 10.1016/j.immuni.2014.06.008          | 41        | Macrophage activation and polarization: nomenclature and experimental guidelines                                             |
| 13 | frank ja        | 10.1152/ajplung.00055.2006            | 38        | Alveolar macrophages contribute to alveolar barrier dysfunction in ventilator-induced lung injury                            |
| 14 | murray pj       | 10.1038/nri3073                       | 36        | Protective and pathogenic functions of macrophage subsets                                                                    |
| 15 | rosseau s       | 10.1152/ajplung.2000.279.1.L25.       | 35        | Phenotypic characterization of alveolar monocyte recruitment in acute respiratory distress syndrome                          |
| 16 | martinez fo     | 10.1146/annurev.immunol.021908.132532 | 34        | Alternative activation of macrophages: an immunologic functional perspective                                                 |
| 17 | gordon s        | 10.1038/nri1733                       | 33        | Monocyte and macrophage heterogeneity                                                                                        |
| 18 | jiang dh        | 10.1038/nm1315                        | 31        | Regulation of lung injury and repair by Toll-like receptors and hyaluronan                                                   |
| 19 | beck-schimmer b | 10.1186/1465-9921-6-61                | 30        | Alveolar macrophages regulate neutrophil recruitment in endotoxin-induced lung injury                                        |
| 20 | vergadi e       | 10.4049/jimmunol.1300959              | 30        | Akt2 deficiency protects from acute lung injury via alternative macrophage activation and miR-146a induction in mice         |
| 21 | hashimoto d     | 10.1016/j.immuni.2013.04.004          | 29        | Tissue-resident macrophages self-maintain locally throughout adult life with minimal contribution from circulating monocytes |
| 22 | gibbons ma      | 10.1164/rccm.201010-1719oc            | 28        | Ly6Chi monocytes direct alternatively activated profibrotic macrophage regulation of lung fibrosis                           |
| 23 | mantovani a     | 10.1016/j.it.2004.09.015              | 28        | The chemokine system in diverse forms of macrophage activation and polarization                                              |
| 24 | zhao mq         | 10.1152/ajplung.00086.2006            | 28        | Alveolar macrophage activation is a key initiation signal for acute lung ischemia-reperfusion injury                         |

|    |              |                                        |    |                                                                                                                                                                              |
|----|--------------|----------------------------------------|----|------------------------------------------------------------------------------------------------------------------------------------------------------------------------------|
| 25 | dhaliwal k   | 10.1164/rccm.201112-2132oc             | 26 | Monocytes control second-phase neutrophil emigration in established lipopolysaccharide-induced murine lung injury                                                            |
| 26 | guilliams m  | 10.1084/jem.20131199                   | 26 | Alveolar macrophages develop from fetal monocytes that differentiate into long-lived cells in the first week of life via GM-CSF                                              |
| 27 | lawrence t   | 10.1038/nri3088                        | 26 | Transcriptional regulation of macrophage polarization: enabling diversity with identity                                                                                      |
| 28 | fadok va     | 10.1172/jci1112                        | 25 | Macrophages that have ingested apoptotic cells in vitro inhibit proinflammatory cytokine production through autocrine/paracrine mechanisms involving TGF-beta, PGE2, and PAF |
| 29 | laskin dl    | 10.1146/annurev.pharmtox.010909.105812 | 25 | Macrophages and tissue injury: agents of defense or destruction?                                                                                                             |
| 30 | westphalen k | 10.1038/nature12902                    | 25 | Sessile alveolar macrophages communicate with alveolar epithelium to modulate immunity                                                                                       |
| 31 | wynn ta      | 10.1038/nature12034                    | 25 | Macrophage biology in development, homeostasis and disease                                                                                                                   |

**S table 2. The top 10 occurrences and the top 10 new APY keywords in Figure 5**

|    | Keyword          | Occurrences | Cluster | Keyword                        | APY     | cluster |
|----|------------------|-------------|---------|--------------------------------|---------|---------|
| 1  | inflammation     | 1042        | 1       | covid-19                       | 2019.88 | 1       |
| 2  | nf-kappa b       | 573         | 2       | cytokine storm                 | 2019.67 | 1       |
| 3  | activation       | 515         | 3       | macrophage activation syndrome | 2019.15 | 1       |
| 4  | lps              | 463         | 2       | evs                            | 2018.39 | 1       |
| 5  | mice             | 374         | 2       | nlrp3                          | 2018.14 | 3       |
| 6  | cell             | 333         | 5       | down-regulation                | 2018.1  | 2       |
| 7  | ams              | 326         | 4       | autophagy                      | 2017.98 | 3       |
| 8  | oxidative stress | 287         | 2       | microrna                       | 2017.95 | 1       |
| 9  | sepsis           | 285         | 3       | macrophage polarization        | 2017.8  | 1       |
| 10 | inhibition       | 257         | 2       | contribute                     | 2017.57 | 3       |
